# Supplementary material
Source: PubMed Central journal article supplement (PMC4696558)
Supplement: NIHMS723896-supplement-04.pdf [file NIHMS723896-supplement-04.pdf]

Figure 1. Adjusted<sup>a</sup> coefficients ( $\beta$ ) and (95% CI) in points on the MDI and PDI of the Bayley Scales of Infant Development at 6-months per two-fold increase in postnatal manganese levels (AUC <sup>55</sup>Mn:<sup>43</sup>Ca) stratified by sex.

<sup>a</sup> Adjusted for child's age, maternal education, maternal intelligence, psychometrician, location of assessment, household poverty, HOME score at 6-months and prenatal Mn dentin. Excluding outliers with studentized residuals > |3|.

Figure 2. Adjusted<sup>a</sup> coefficients ( $\beta$ ) and (95% CI) in points on the MDI and PDI of the Bayley Scales of Infant Development among girls at 6-months for a two-fold increase in prenatal manganese levels (AUC <sup>55</sup>Mn:<sup>43</sup>Ca) stratified by maternal hemoglobin concentrations during pregnancy.

<sup>a</sup> Adjusted for child's age, maternal education, maternal intelligence, psychometrician, location of assessment, household poverty, and HOME score at 6-months. Excluding outliers with studentized residuals > |3|.

Supplemental Figure 1. Adjusted<sup>a</sup> coefficients ( $\beta$ ) and (95% CI) in points on the MDI and PDI of the Bayley Scales of Infant Development at 6 months for tertiles of postnatal manganese level (<sup>55</sup>Mn:<sup>43</sup>Ca AUC).

<sup>a</sup> Adjusted for child's age, sex, maternal education, maternal intelligence, psychometrician, location of assessment, household poverty, HOME score at 6 months, and prenatal Mn dentin.

Supplemental Figure 2. Adjusted<sup>a</sup> coefficients ( $\beta$ ) and (95% CI) in points on the MDI and PDI of the Bayley Scales of Infant Development at 6 months for a two-fold increase in prenatal manganese levels (AUC <sup>55</sup>Mn:<sup>43</sup>Ca) stratified by prenatal lead concentrations.

<sup>a</sup> Adjusted for child's age, sex, maternal education, maternal intelligence, psychometrician, location of assessment, household poverty, HOME score at 6 months, and prenatal Mn dentin. Excluding outliers with studentized residuals > |3|.
